# Supplementary material for: Autophagy is induced in the skeletal muscle of cachectic cancer patients
Source: PubMed Central journal article supplement (PMC4962093; doi:10.1038/srep30340), 2016-07-27
Supplement: srep30340-s1.pdf [file srep30340-s1.pdf]

## Supplementary Information

### AUTOPHAGY IS INDUCED IN THE SKELETAL MUSCLE OF CACHECTIC CANCER PATIENTS

Zaira Aversa<sup>1\*</sup>, Fabrizio Pin<sup>2,3\*</sup>, Simone Lucia<sup>1</sup>, Fabio Penna<sup>2,3</sup>, Roberto Verzaro<sup>4</sup>, Maurizio Fazi<sup>4</sup>,  
Giuseppina Colasante<sup>5</sup>, Andrea Tirone<sup>5</sup>, Filippo Rossi Fanelli<sup>1</sup>, Cesarina Ramaccini<sup>1</sup>,  
Paola Costelli<sup>2,3</sup>, Maurizio Muscaritoli<sup>1</sup>

<sup>1</sup>Department of Clinical Medicine, Sapienza University of Rome, Rome, Italy

<sup>2</sup>Department of Clinical and Biological Sciences, University of Turin, Turin, Italy

<sup>3</sup>Interuniversity Institute of Myology, Italy

<sup>4</sup>Department of Surgery, M.G. Vannini Hospital, Rome, Italy

<sup>5</sup>UOSA Chirurgia Bariatrica, Azienda Ospedaliera Universitaria Senese, Siena, Italy

\*Zaira Aversa and Fabrizio Pin equally contributed.

#### Corresponding author:

*Maurizio Muscaritoli*, Department of Clinical Medicine, Sapienza, University of Rome, Viale dell'Università 37, 00185 Rome, Italy (e-mail: [maurizio.muscaritoli@uniroma1.it](mailto:maurizio.muscaritoli@uniroma1.it)); or

*Paola Costelli*, Department of Clinical and Biological Sciences, University of Turin - Corso Raffaello 30, 10125 Turin, Italy (e-mail: [paola.costelli@unito.it](mailto:paola.costelli@unito.it)).

**Supplementary Table S1.** Oligonucleotide sequences used for real-time PCR

| <i>Gene</i>       | <i>NCBI Reference Sequence</i> | <i>Primer sequence</i>                                 |
|-------------------|--------------------------------|--------------------------------------------------------|
| <b>Beclin-1</b>   | NM_003766.3                    | FW: AGGAACTCACAGCTCCATTAC<br>RW: AATGGCTCCTCTCCTGAGTT  |
| <b>p62/SQSTM1</b> | NM_003900.4                    | FW: ATCGGAGGATCCGAGTGT<br>RW: TGGCTGTGAGCTGCTCTT       |
| <b>LC3B</b>       | NM_022818.4                    | FW: GCCGCACCTTCGAACAAA<br>RW: TCGTTCTATTATCACCGGGATTTT |
| <b>Bnip3</b>      | NM_004052.2                    | FW: CTGGACGGAGTAGCTCCAAG<br>RW: GCCCTGTTGGTATCTTGTGG   |
| <b>Nix/Bnip3L</b> | NM_004331.2                    | FW: GATGTGGAAATGCACACCAG<br>RW: GACCAGTCTGATACCCAGTCC  |
| <b>PINK1</b>      | NM_032409.2                    | FW: TGGTCGACTACCCTGATGTG<br>RW: CGCAGGGTACAGGGATAGTT   |
| <b>Parkin</b>     | NM_004562.2                    | FW: TCGCAACAAATAGTCGGAAC<br>RW: GAACAAACTGCCGATCATTG   |
| <b>TFEB</b>       | NM_007162.2                    | FW: GGTGCAGTCCTACCTGGAGA<br>RW: GTGGGCAGCAAACCTTGTTCC  |
| <b>GAPDH</b>      | NM_002046.3                    | FW: CCACTCCTCCACCTTTGAC<br>RW: ACCCTGTTGCTGTAGCCA      |
| <b>TBP</b>        | NM_003194                      | FW: TGCACAGGAGCCAAGAGTGAA<br>RW: CACATCACAGCTCCCCACCA  |

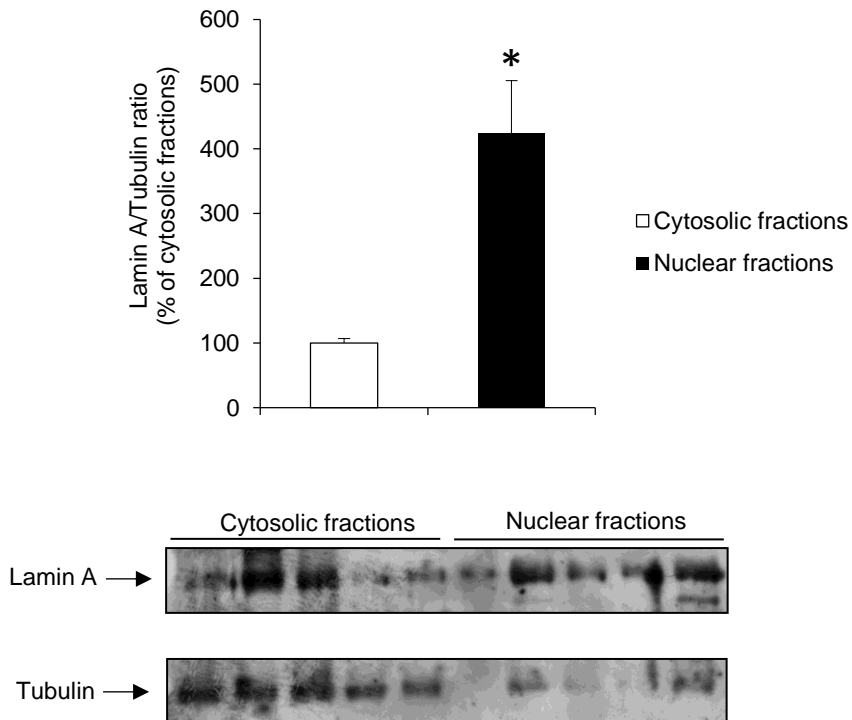

**Supplementary Figure S1. Purity of the cytosolic and nuclear fractions.** (A) Lamin A/Tubulin ratio was evaluated by western blotting in cytosolic (n=5) and nuclear (n=5) fractions: representative western blots for Lamin A and Tubulin are shown on the lower panel and densitometric quantifications of Lamin A/Tubulin ratio are shown on the upper panel. Data (mean  $\pm$  SEM) are expressed as percentage of cytosolic fractions. Significance of the differences: \*p<0.05 vs cytosolic fractions.

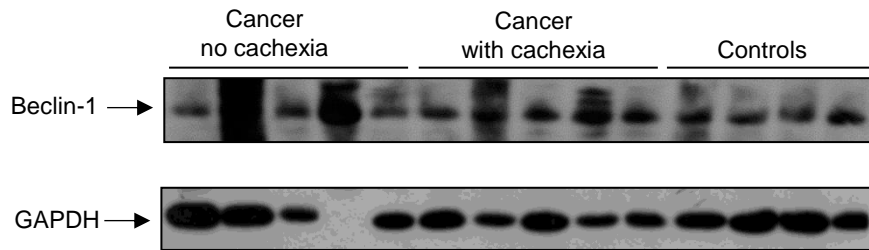

**Supplementary Figure S2. Beclin-1 protein expression in rectus abdominis muscle of cancer and control patients.** Whole blot including the representative patterns selected for beclin-1 expression in Fig. 1C (lanes 1 and 3).
